# Supplementary material for: Targeted Deletion of Kindlin-2 in Mouse Mammary Glands Inhibits Tumor Growth, Invasion, and Metastasis Downstream of a TGF-β/EGF Oncogenic Signaling Pathway
Source: MDPI journal article supplement (doi:10.3390/cancers14030639), 2022-01-27
Supplement: s1 [file s1]

## **Supplementary Information.**

**File S1.** Detailed description of the procedures used to generate the Kindlin-2 (Fermt2) floxed mouse strain by Applied StemCell.

## Generation of F1 heterozygotes from F0 founders

### Customer information

|                         |                  |
|-------------------------|------------------|
| <b>Project Title</b>    | mFermt2-cKO      |
| <b>Job Ticket</b>       | MC096            |
| <b>Client Name</b>      | Ed Plow, Ph.D.   |
| <b>Client Institute</b> | Cleveland Clinic |
| <b>Report Date</b>      | 02/18/2018       |

### Summary

To generate F1 heterozygotes, the F0 founders containing both upstream and downstream of loxp insertion at the targeted introns were set up for breeding with the wild type C57BL/6J. The F1 pups derived from the F0 founders were genotyped for selection of the heterozygotes with both upstream and downstream loxps presence at the targeted sites.

### Genotyping analysis

Tail or ear tissues were collected from individual pups at age of d5 to 10 post birth. Genomic DNA was extracted from the tissue samples. PCR/NGS with genomic DNA as a template were applied to analyze the targeted sites. PCR/NGS analysis were applied to both 5' and 3' targeted-sites to screen for the pups with both 5' and 3' loxp insertion.

**Table 1. Primers used in identification of Fermt2 mutants**

| Primer name             | Primer sequence                       | Amplicon (bp) |
|-------------------------|---------------------------------------|---------------|
| <b>Genotyping PR 5F</b> | 5' -CTTCCCTCAGTGATGGAGTGTGATCTGAG-3'  | 230/264       |
| <b>Genotyping PR 3R</b> | 5' -GGAGTCAGAGAGAAATGGGCACTCTAGGTG-3' |               |
| <b>Genotyping PR 3F</b> | 5' -CTAAGCAGGCAGGTTGCCTGGAC-3'        | 288/322       |
| <b>Genotyping PR 3R</b> | 5' -CTCTTACCCACTGAGCCATCTCACC-3'      |               |

### Results

Several founders including 3024#2, Male and 3024#3, female (DOB 10/16/17) were bred with wild type mice. From 3024#3 female F0 founder two litters with total 12 pups were born. After PCR/sequencing analysis, 5 pups (2 pups in the 1<sup>st</sup> litter, A litter were not saved due to wrong decision) were determined to be heterozygotes with perfect insertion of the loxps at both intron sites (NGS data for 3024#3B#2, 5, 8 from 2<sup>nd</sup> litter, B litter were shown below Fig1).

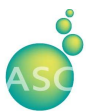**MC096-5LP-1-30243B-2**

|                              |                                                                |
|------------------------------|----------------------------------------------------------------|
| MC096-5LP-30243B-2_5742_63.3 | GTAAGCTGAAATAAACCCCTTTCTTCCTCAGTCACCTTTGGTCATGTTGTTTATCTTACACA |
| MC096-5LP-30243B-2_3324_36.7 | GTAAGCTGAAATAAACCCCTTTCTTCCTCAGTCACCTTTGGTCATGTTGTTTATCTTACACA |
| MC096-5LP_ref                | GTAAGCTGAAATAAACCCCTTTCTTCCTCAGTCACCTTTGGTCATGTTGTTTATCTTACACA |
| MC096-5LP-30243B-2_5742_63.3 | GCAGTAGAAACGCTAACCCCTTCA-----GT                                |
| MC096-5LP-30243B-2_3324_36.7 | GCAGTAGAAACGCTAACCCCTTCAATAACTTCGTATAATGTATGCTATACGAAGTTATGT   |
| MC096-5LP_ref                | GCAGTAGAAACGCTAACCCCTTCAATAACTTCGTATAATGTATGCTATACGAAGTTATGT   |
| MC096-5LP-30243B-2_5742_63.3 | TACCGTCCTCAGGATATATTTTGGAAAGCATGTTTGGGCTGCAAGCTGTTTATGTTGTTT   |
| MC096-5LP-30243B-2_3324_36.7 | TACCGTCCTCAGGATATATTTTGGAAAGCATGTTTGGGCTGCAAGCTGTTTATGTTGTTT   |
| MC096-5LP_ref                | TACCGTCCTCAGGATATATTTTGGAAAGCATGTTTGGGCTGCAAGCTGTTTATGTTGTTT   |
| MC096-5LP-30243B-2_5742_63.3 | TGGAGTTCTTTTACGCCCCCT                                          |
| MC096-5LP-30243B-2_3324_36.7 | TGGAGTTCTTTTACGCCCCCT                                          |
| MC096-5LP_ref                | TGGAGTTCTTTTACGCCCCCT                                          |

**MC096-3LP-1-30243B-2**

|                             |                                                               |
|-----------------------------|---------------------------------------------------------------|
| MC096-3LP-30243B-2_844_61.3 | GCTCCCACCTAGAAAGCCTAAGGGCTGCTTAGTGTCACGCCACACACTTGATGACTGCC   |
| MC096-3LP-30243B-2_533_38.7 | GCTCCCACCTAGAAAGCCTAAGGGCTGCTTAGTGTCACGCCACACACTTGATGACTGCC   |
| MC096-3LP_ref               | GCTCCCACCTAGAAAGCCTAAGGGCTGCTTAGTGTCACGCCACACACTTGATGACTGCC   |
| MC096-3LP-30243B-2_844_61.3 | GCAGCAGGGTCTGTAAACCTGG-----TGC                                |
| MC096-3LP-30243B-2_533_38.7 | GCAGCAGGGTCTGTAAACCTGGTATAACTTCGTATAATGTATGCTATACGAAGTTATGC   |
| MC096-3LP_ref               | GCAGCAGGGTCTGTAAACCTGGTATAACTTCGTATAATGTATGCTATACGAAGTTATGC   |
| MC096-3LP-30243B-2_844_61.3 | GCATCCCACCTATGTAGCTTGGTGCCCTTTTCTTTGTTACATTGTGATCATATAAAACCGG |
| MC096-3LP-30243B-2_533_38.7 | GCATCCCACCTATGTAGCTTGGTGCCCTTTTCTTTGTTACATTGTGATCATATAAAACCGG |
| MC096-3LP_ref               | GCATCCCACCTATGTAGCTTGGTGCCCTTTTCTTTGTTACATTGTGATCATATAAAACCGG |
| MC096-3LP-30243B-2_844_61.3 | CTCACTGGCAGGCGATTTTG                                          |
| MC096-3LP-30243B-2_533_38.7 | CTCACTGGCAGGCGATTTTG                                          |
| MC096-3LP_ref               | CTCACTGGCAGGCGATTTTG                                          |

**Applied StemCell, Inc.**

521 Cottonwood Dr, Suite 111, Milpitas, CA 95035

Phone: (866) 497-4180 (US Toll Free); 408-773-8007 Fax: 408-773-8238

[info@appliedstemcell.com](mailto:info@appliedstemcell.com) [www.appliedstemcell.com](http://www.appliedstemcell.com)

**MC096-5LP-1-30243B-5**

|                              |                                                              |
|------------------------------|--------------------------------------------------------------|
| MC096-5LP-30243B-5_5639_63.1 | GTAAGCTGAAATAAACCCCTTCTTCCTCAGTCACCTTGGTCATGTTGTTTATCTTACACA |
| MC096-5LP-30243B-5_3302_36.9 | GTAAGCTGAAATAAACCCCTTCTTCCTCAGTCACCTTGGTCATGTTGTTTATCTTACACA |
| MC096-5LP_ref                | GTAAGCTGAAATAAACCCCTTCTTCCTCAGTCACCTTGGTCATGTTGTTTATCTTACACA |
| MC096-5LP-30243B-5_5639_63.1 | GCAGTAGAAACGCTAACCCCTTCA-----GT                              |
| MC096-5LP-30243B-5_3302_36.9 | GCAGTAGAAACGCTAACCCCTTCAATAACTTCGTATAATGTATGCTATACGAAGTTATGT |
| MC096-5LP_ref                | GCAGTAGAAACGCTAACCCCTTCAATAACTTCGTATAATGTATGCTATACGAAGTTATGT |
| MC096-5LP-30243B-5_5639_63.1 | TACCGTCCTCAGGATATATTTTGGAAAGCATGTTTGGGCTGCAAGCTGTTTATGTTGTTT |
| MC096-5LP-30243B-5_3302_36.9 | TACCGTCCTCAGGATATATTTTGGAAAGCATGTTTGGGCTGCAAGCTGTTTATGTTGTTT |
| MC096-5LP_ref                | TACCGTCCTCAGGATATATTTTGGAAAGCATGTTTGGGCTGCAAGCTGTTTATGTTGTTT |
| MC096-5LP-30243B-5_5639_63.1 | TGGAGTTCTTTTACGCCCCCT                                        |
| MC096-5LP-30243B-5_3302_36.9 | TGGAGTTCTTTTACGCCCCCT                                        |
| MC096-5LP_ref                | TGGAGTTCTTTTACGCCCCCT                                        |

**MC096-3LP-1-30243B-5**

|                              |                                                              |
|------------------------------|--------------------------------------------------------------|
| MC096-3LP-30243B-5_843_34.2  | GCTCCCACTTAGAAGCCTAAGGGCTGCTTAGTGTCCACGCCACACACTTGATGACTGCC  |
| MC096-3LP_ref                | GCTCCCACTTAGAAGCCTAAGGGCTGCTTAGTGTCCACGCCACACACTTGATGACTGCC  |
| MC096-3LP-30243B-5_1621_65.8 | GCTCCCACTTAGAAGCCTAAGGGCTGCTTAGTGTCCACGCCACACACTTGATGACTGCC  |
| MC096-3LP-30243B-5_843_34.2  | GCAGCAGGGTCTGTAAACCTGGTATAACTTCGTATAATGTATGCTATACGAAGTTATGC  |
| MC096-3LP_ref                | GCAGCAGGGTCTGTAAACCTGGTATAACTTCGTATAATGTATGCTATACGAAGTTATGC  |
| MC096-3LP-30243B-5_1621_65.8 | GCAGCAGGGTCTGTAAACCTGG-----TGC                               |
| MC096-3LP-30243B-5_843_34.2  | GCATCCCACTATGTAGCTTGGTGCCCTTTTCTTTGTTACATTGTGATCATATAAAACCGG |
| MC096-3LP_ref                | GCATCCCACTATGTAGCTTGGTGCCCTTTTCTTTGTTACATTGTGATCATATAAAACCGG |
| MC096-3LP-30243B-5_1621_65.8 | GCATCCCACTATGTAGCTTGGTGCCCTTTTCTTTGTTACATTGTGATCATATAAAACCGG |
| MC096-3LP-30243B-5_843_34.2  | CTCACTGGCAGGCGATTTTG                                         |
| MC096-3LP_ref                | CTCACTGGCAGGCGATTTTG                                         |
| MC096-3LP-30243B-5_1621_65.8 | CTCACTGGCAGGCGATTTTG                                         |

**Applied StemCell, Inc.**

521 Cottonwood Dr, Suite 111, Milpitas, CA 95035

Phone: (866) 497-4180 (US Toll Free); 408-773-8007 Fax: 408-773-8238

[info@appliedstemcell.com](mailto:info@appliedstemcell.com) [www.appliedstemcell.com](http://www.appliedstemcell.com)

**MC096-5LP-1-30243B-8**

|                              |                                                               |
|------------------------------|---------------------------------------------------------------|
| MC096-5LP-30243B-8_5869_60.1 | GTAAGCTGAAATAAACCCCTTCTTCCTCAGTCACCTTGGTCATGTTGTTTATCTTACACA  |
| MC096-5LP-30243B-8_3889_39.9 | GTAAGCTGAAATAAACCCCTTCTTCCTCAGTCACCTTGGTCATGTTGTTTATCTTACACA  |
| MC096-5LP_ref                | GTAAGCTGAAATAAACCCCTTCTTCCTCAGTCACCTTGGTCATGTTGTTTATCTTACACA  |
| MC096-5LP-30243B-8_5869_60.1 | GCAGTAGAAACGCTAACCCCTTCA-----GT                               |
| MC096-5LP-30243B-8_3889_39.9 | GCAGTAGAAACGCTAACCCCTTCAATAACTTCGTATAATGTATGCTATACGAAGTTATGT  |
| MC096-5LP_ref                | GCAGTAGAAACGCTAACCCCTTCAATAACTTCGTATAATGTATGCTATACGAAGTTATGT  |
| MC096-5LP-30243B-8_5869_60.1 | TACCGTCCTCAGGATATATTTTGGAAAGCATGTTGGGCTGCAAGCTGTTTCATGGTTGTTT |
| MC096-5LP-30243B-8_3889_39.9 | TACCGTCCTCAGGATATATTTTGGAAAGCATGTTGGGCTGCAAGCTGTTTCATGGTTGTTT |
| MC096-5LP_ref                | TACCGTCCTCAGGATATATTTTGGAAAGCATGTTGGGCTGCAAGCTGTTTCATGGTTGTTT |
| MC096-5LP-30243B-8_5869_60.1 | TGGAGTTCTTTTCACGCCCT                                          |
| MC096-5LP-30243B-8_3889_39.9 | TGGAGTTCTTTTCACGCCCT                                          |
| MC096-5LP_ref                | TGGAGTTCTTTTCACGCCCT-                                         |

**MC096-3LP-1-30243B-8**

|                             |                                                             |
|-----------------------------|-------------------------------------------------------------|
| MC096-3LP-30243B-8_310_37.9 | GCTCCCACTTAGAAGCCTAAGGGCTGCTTAGTGTCACGCCACACACTTGATGACTGCC  |
| MC096-3LP_ref               | GCTCCCACTTAGAAGCCTAAGGGCTGCTTAGTGTCACGCCACACACTTGATGACTGCC  |
| MC096-3LP-30243B-8_509_62.1 | GCTCCCACTTAGAAGCCTAAGGGCTGCTTAGTGTCACGCCACACACTTGATGACTGCC  |
| MC096-3LP-30243B-8_310_37.9 | GCAGCAGGGTCTGTAAACCTGGTATAACTTCGTATAATGTATGCTATACGAAGTTATGC |
| MC096-3LP_ref               | GCAGCAGGGTCTGTAAACCTGGTATAACTTCGTATAATGTATGCTATACGAAGTTATGC |
| MC096-3LP-30243B-8_509_62.1 | GCAGCAGGGTCTGTAAACCTGG-----TGC                              |
| MC096-3LP-30243B-8_310_37.9 | GCATCCCACTATGTAGCTTGGTGCCCTTTCTTTGTTACATTGTGATCATATAAAACCGG |
| MC096-3LP_ref               | GCATCCCACTATGTAGCTTGGTGCCCTTTCTTTGTTACATTGTGATCATATAAAACCGG |
| MC096-3LP-30243B-8_509_62.1 | GCATCCCACTATGTAGCTTGGTGCCCTTTCTTTGTTACATTGTGATCATATAAAACCGG |
| MC096-3LP-30243B-8_310_37.9 | CTCACTGGCAGGCGATTTTG                                        |
| MC096-3LP_ref               | CTCACTGGCAGGCGATTTTG                                        |
| MC096-3LP-30243B-8_509_62.1 | CTCACTGGCAGGCGATTTTG                                        |

**Figure 1: The heterozygotes determined from PCR/NGS analysis of F0 founder 3024#3 B litter. The loxp sequence is highlighted in yellow. MC096, project #; LP, loxp; 30243B, the B litter from F0 founder 3024#3; -2, 5, 8, the heterozygous pup #.**

**Shipment****Applied StemCell, Inc.**

521 Cottonwood Dr, Suite 111, Milpitas, CA 95035

Phone: (866) 497-4180 (US Toll Free); 408-773-8007 Fax: 408-773-8238

[info@appliedstemcell.com](mailto:info@appliedstemcell.com) [www.appliedstemcell.com](http://www.appliedstemcell.com)

The mice when they are weaned at age of 3 weeks to be shipped to clients old are listed in the table 2. The female F0 founder 3024#3 will be bred to make one more litter as a backup.

**Table 2 mice to be shipped**

| Mouse ID  | DOB    | gender | 5 loxp | 3 loxp |
|-----------|--------|--------|--------|--------|
| 3024#3B#2 | 2/1/18 | M      | V      | v      |
| 3024#3B#5 | 2/1/18 | M      | v      | V      |
| 3024#3B#8 | 2/1/18 | F      | V      | v      |

**Prepared by:**

James Luo, Ph.D.  
Senior Scientist & Project Manager  
Applied StemCell, Inc.  
[James.luo@appliedstemcell.com](mailto:James.luo@appliedstemcell.com)

## Generation of gRNAs and DNA donors for mFermt2-cKO Models

### Customer Information

|                         |                  |
|-------------------------|------------------|
| <b>Project Title</b>    | mFermt2-cKO      |
| <b>Job Ticket</b>       | MC096            |
| <b>Client Name</b>      | Ed Plow, Ph.D.   |
| <b>Client Institute</b> | Cleveland Clinic |
| <b>Report Date</b>      | 11/22/2016       |

### Summary

The goal of this project is to generate mouse *Fermt2* conditional knockout mouse model (*Fermt2*-cKO). This can be achieved by inserting two LoxP sites in the introns flanking certain exons of *Fermt2* gene (ENSEMBL Gene ID: ENSMUSG00000037712) to cover all 4 transcripts (splice variants). In such a model, those exons can be removed when the LoxP-inserted mice are crossed with Cre-expressing mice. To promote knockin of the LoxP sequences, double strand breaks (DSBs) will be made through CRISPR/Cas9 system. Single guide RNA for each targeting site was prepared and validated for the efficiency in directing the cleavage in the mouse genome. Single stranded oligodeoxynucleotide (ssODN) donors were designed and generated for knockin of LoxP sequence according to the most active gRNA sequences. Qualified gRNAs, ssODNs and Cas9 protein were prepared for zygotic microinjection.

### Selection, preparation, and validation of gRNAs for application of CRISPR/Cas9 system

#### 1. Strategy of guide RNA (gRNA) selection

The criteria for gRNA selection are the high specificity and the close distance to the targeting site. The exons 1 or 2 to exon 14 from *Fermt2*-001 gene transcripts (total 15 exons) are to be flanked by LoxP in order to remove all these flanked exons in the presence of Cre recombinase resulting in knockout of all 4 transcripts (splice variants). A LoxP sequence will be respectively inserted into 5'UTR or intron 1 and intron 14 where a DSB will be made through CRISPR/Cas9 approach to promote site specific knock-in. Multiple gRNA candidates targeting 5'UTR (*Fermt2*.5g63 and *Fermt2*.5g55) or intron 1 (*Fermt2*.5g8 and *Fermt2*.5g53) and intron 14 (*Fermt2*.3g68 and *Fermt2*.3g37) were selected. The sequences of the gRNA candidates and the Protospacer Adjacent Motif (PAM) are listed in **Table 1**.

**Table 1. Guide RNA candidates for *Fermt2* gene cKO**

| Name                | Sequence                     | PAM |
|---------------------|------------------------------|-----|
| <i>Fermt2</i> .5g63 | 5' -CGCGCCCGCCTAGCGGACTT-3'  | GGG |
| <i>Fermt2</i> .5g55 | 5' -CGGCTACGCGCGCACAAACCA-3' | AGG |

|             |                             |     |
|-------------|-----------------------------|-----|
| Fermt2.5g8  | 5' -CCCCTTCAGTTACCGTCCTC-3' | AGG |
| Fermt2.5g53 | 5' -ATCCTGAGGACGGTAACTGA-3' | AGG |
| Fermt2.3g68 | 5' -TACATAGTGGGATGCGCACC-3' | AGG |
| Fermt2.3g37 | 5' -CACTGGCAGGCGATTTTGCT-3' | TGG |

## 2. Assessment of gRNA activity by next-generation sequencing (NGS)

After insertion of double-stranded oligos into a dual expression vector pBT-U6-Cas9-2A-GFP, each construct was transfected into mouse N2A cells. DNA was extracted from transfected cells and NGS was employed to analyze the percentage of non-homologous end joining (NHEJ) with the following primers (**Table 2**). The targeted regions and the picked primers for the tests were shown in the **Figure 1**. Fermt2.5g53 (targeting in intron1) and Fermt2.3g68 (targeting intron14) show great cutting efficiency which passes our QC standard of minimum efficiency (15%) (**Figure 2**). The candidate targeting sites 5g63 and 5g55 were not successfully tested due to the high percentage of G-C contents in the region which caused failure in sequencing, both sites were not employed for further experiments. The final strategy for making Fermt2 cKO mouse model is illustrated in **Figure 3**.

**Table 2 Primers for deep sequencing**

| Primer ID      | Sequence                                                                      |
|----------------|-------------------------------------------------------------------------------|
| Fermt2.5g.ds.F | 5' - <b>CACTCTTCCCTACACGACGCTCTTCCGATCT</b> GCATGCTTCCGTGCCATCTGCTTTA-3'      |
| Fermt2.5g.ds.R | 5' - <b>GTGACTGGAGTTCAGACGTGTGCTCTTCCGATCT</b> GCCTCTGGCTTTTGTGGATACCAAGCA-3' |
| Fermt2.3g.ds.F | 5' - <b>CACTCTTCCCTACACGACGCTCTTCCGATCT</b> GCCTCTATGCCTCACCTCAGCCTTC-3'      |
| Fermt2.3g.ds.R | 5' - <b>GTGACTGGAGTTCAGACGTGTGCTCTTCCGATCT</b> ACGGATGGTGTGAGCCACCATGTG-3'    |

Illumina adapters in color. Red = Forward adapter. Blue = Reverse adapter. Black = base primer.

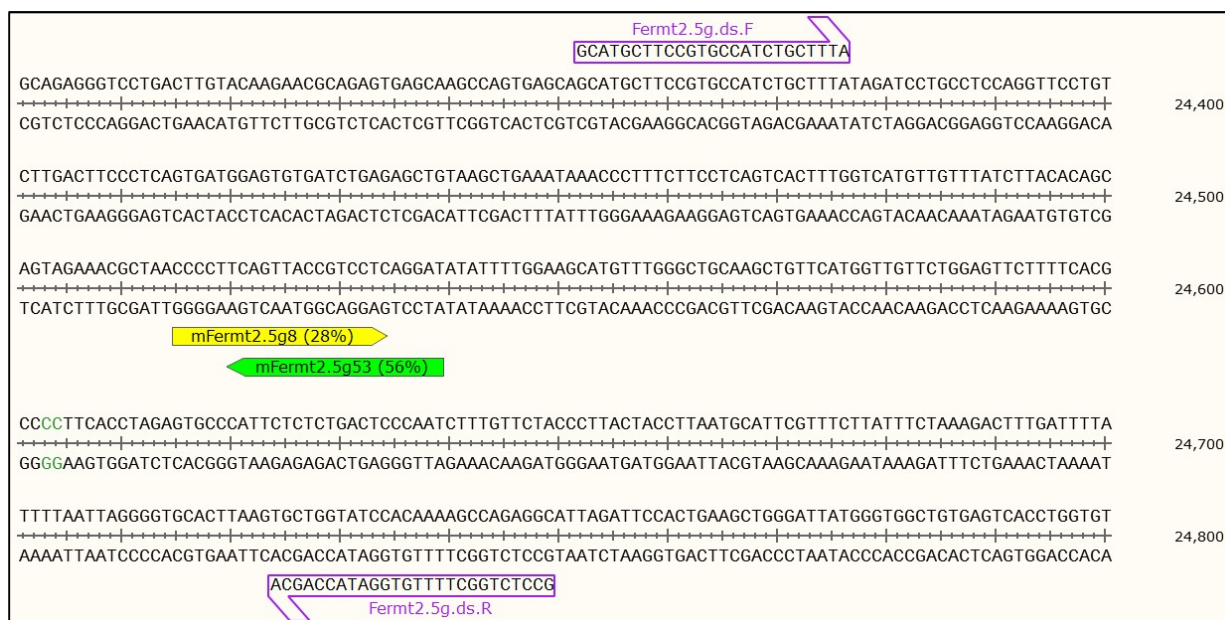

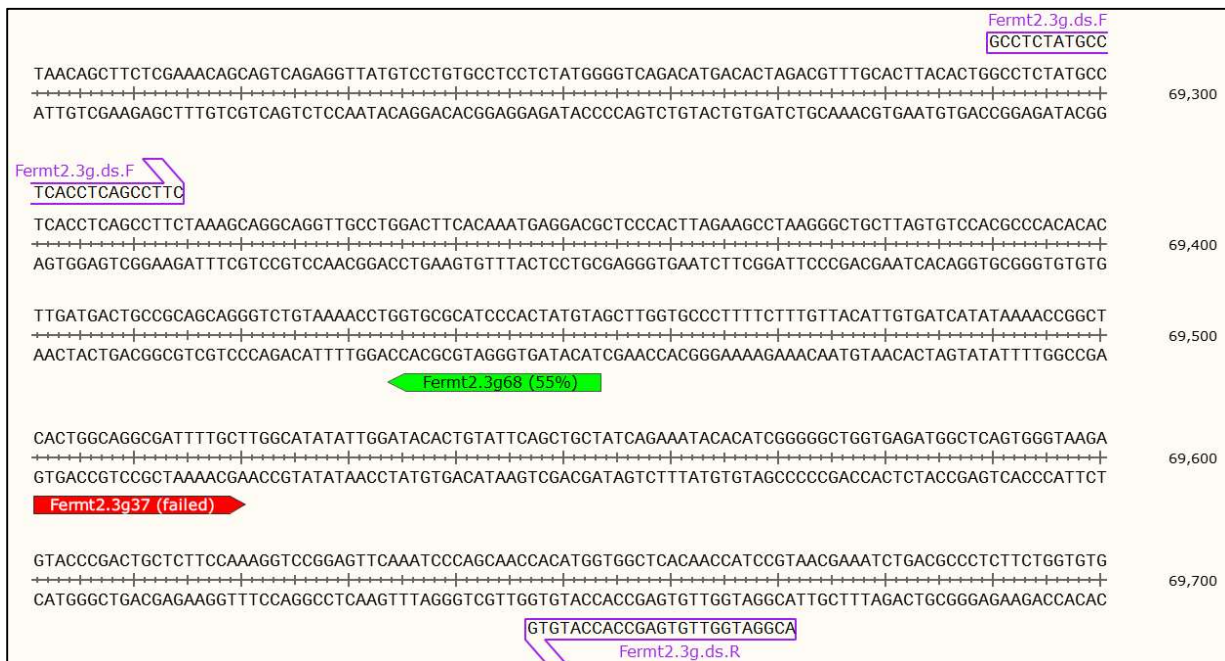

**Figure 1.** the targeted regions and the picked primers for the deep sequencing. Top panel, upstream in the intron 1; bottom panel, downstream in the intron 14.

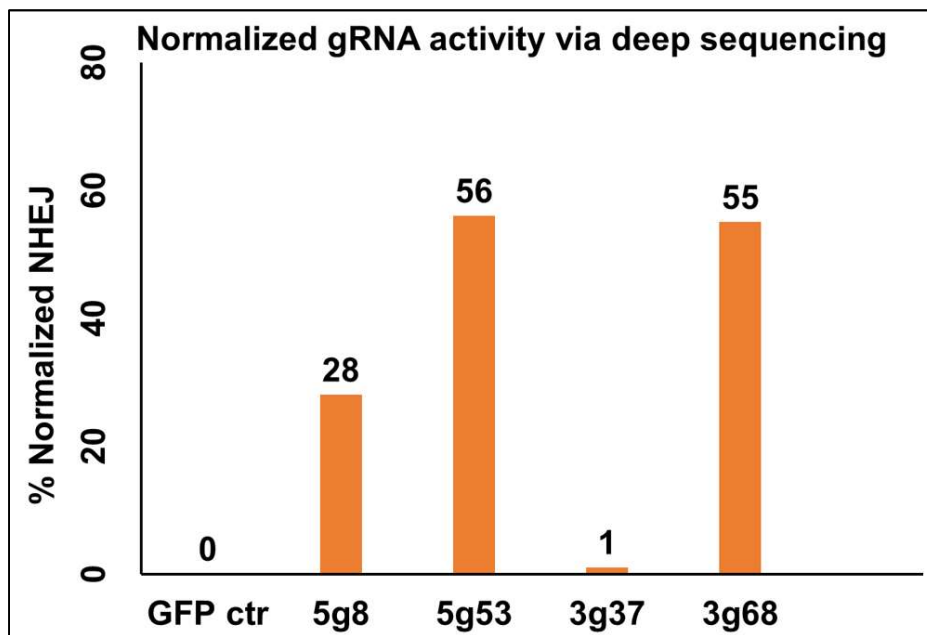

**Figure 2.** The activity of the selected gRNA measured by NHEJ% through deep sequencing

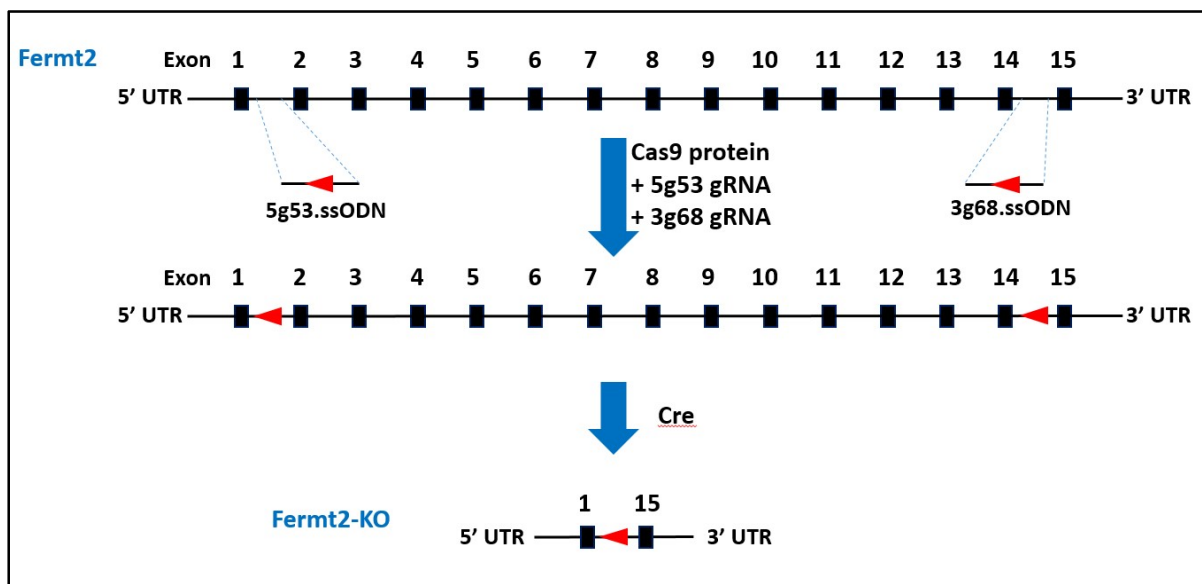

**Figure 3.** The final strategy to make *Fermt2* gene cKO transgenic mouse model

### 3. Generation of single gRNA through *in vitro* transcription (IVT)

Based on the validated gRNAs *Fermt2*.5g53 and *Fermt2*.3g68 targeting sites, the forward primers *Fermt2*. 5g53.sgRNA\_F or *Fermt2*. 3g68.sgRNA\_F containing a leading T7 promoter sequence, a targeting site guide sequence, and a universal annealing oligo at 3' end as well as a reverse primer were synthesized (**Table 3**). With these primers, a plasmid pSpCas9 (BB)-2A-GFP (#48138, Addgene, or pX330) was applied as a template to make respective IVT template in a PCR reaction. The PCR products were gel-purified for IVT using MEGAshortscript T7 kit (Life Technologies, cat#: Am1354M). The IVT was performed with the mMACHINE T7 ULTRA kit (Life Technologies, cat#: AM1345) according to the manual. IVT gRNAs were purified using MEGAclear kit (Life Technologies, cat#: AM1908M) and eluted in RNA elution buffer. The eluted RNA will be checked by agarose gel electrophoresis and quantitated by NanoDrop measurement ( $A_{260}/A_{280} \geq 2.0$ ).

**Table 3. Primers used for T7- single gRNA RNA IVT**

| Name                        | Sequence                                                           |
|-----------------------------|--------------------------------------------------------------------|
| <b>Fermt2. 5g53.sgRNA_F</b> | 5'-CGTTAATACGACTCACTATAGGATCCTGAGGACGCTAACTGAGTTTTAGAGCTAGAAATA-3' |
| <b>Fermt2. 3g68.sgRNA_F</b> | 5'-CGTTAATACGACTCACTATAGGTACATAGTGGGATGCGCACCGTTTTAGAGCTAGAAATA-3' |
| <b>sgRNA.scaffold_R</b>     | 5'-AAAAAAGCACCGACTCGGTGCCAC-3'                                     |

## Donor DNA design and preparation

### 1. Donor ssODN design and synthesis

In order to insert Lox P sites into the intron 1 and intron 14 of Fermt2 gene through endogenous homology-directed repair (HDR), two ssODNs containing 5' and 3' homologous arms flanking the Lox P sequence were designed for synthesis.

**mFermt2.5g53.ssODN:** **LoxP**; Target site; **PAM**

GTAAGCTGAAATAAACCCCTTTCTTCCTCAGTCACTTTGGTCATGTTGTTTATCTTACACAGCAGTAGAAACGCTAAC  
 CCTTCAATAACTTCGTATAATGTATGCTATACGAAGTTATGTTACCGTCCTCAGGATATATTTTGAAGCATGTTT  
 GGGCTGCAAGCTGTTTCATGGTTGTTCTGGAGTTCTTTTCACGCCCC

**mFermt2.3g68.ssODN:** **LoxP**; Target site; **PAM**

GCTCCCACTTAGAAGCCTAAGGGCTGCTTAGTGTCCACGCCCACACACTTGATGACTGCCGCAGCAGGGTCTGTAA  
 AACCTGGTATAACTTCGTATAATGTATGCTATACGAAGTTATGCGCATCCCACTATGTAGCTTGTTGCCCTTTTCTTT  
 GTTACATTGTGATCATATAAAACCGGCTCACTGGCAGGCGATTTTG

#### Prepared by:

James Luo

Senior Scientist & Project Manager

Applied StemCell, Inc.

[James.luo@appliedstemcell.com](mailto:James.luo@appliedstemcell.com)

## Identification of F0 founders of mFermt2-cKO

### Customer information

|                         |                  |
|-------------------------|------------------|
| <b>Project Title</b>    | mFermt2-CKO      |
| <b>Job Ticket</b>       | MC096            |
| <b>Client Name</b>      | Ed Plow, Ph.D.   |
| <b>Client Institute</b> | Cleveland Clinic |
| <b>Report Date</b>      | 01/22/2017       |

### Summary

CRISPR/Cas9 system was applied to generate mFermt2-cKO mouse models. According to the design (refer to the report1), a mixture of both upstream and downstream of gRNAs, both donor ssODN containing a loxP site, and recombinant Cas9 protein was microinjected into mouse zygotes that were transferred into pseudo-pregnant females to produce F0 pups. F0 pups were genotyped by PCR and sequencing to analyze the potentially modified targeting sites for LoxP insertion, INDEL, or wild type (wt) sequence. Twelve F0 pups was born on 1/4/17, their genotypes were determined (**Table 1**). The further steps (retargeting and 2<sup>nd</sup> round of injection) will be taken to produce the Fermt2 F0 founders.

**Table 1: 1<sup>st</sup> round microinjection and pups born**

| gRNAs:<br>5g53 + 3g68<br>(ng/μl) | Donor DNA:<br>5'ssODN + 3' ssODN<br>(ng/μl) | Cas9 protein<br>(ng/μl) | Injection<br>route | #<br>embryos<br>injected | # embryos/#<br>recipient | # Pups<br>born |
|----------------------------------|---------------------------------------------|-------------------------|--------------------|--------------------------|--------------------------|----------------|
| 50 + 50                          | 125 + 125                                   | 100                     | cytoplasmic        | 175                      | 137/5                    | 12             |

**Applied StemCell, Inc.**

521 Cottonwood Dr, Suite 111, Milpitas, CA 95035

Phone: (866) 497-4180 (US Toll Free); 408-773-8007 Fax: 408-773-8238

[info@appliedstemcell.com](mailto:info@appliedstemcell.com) [www.appliedstemcell.com](http://www.appliedstemcell.com)

## Method - Identification of mFermt2-cKO mice

Tail tissues from F0 mice were collected and DNA extraction was performed individually. One set of PCR primers, “genotyping PR 5F/5R”, amplifying a 230 bp (wt) or 264 bp (LoxP) fragment in intron 1-2, and another set of PCR primers, “genotyping PR 3F/3R”, amplifying a 288 bp (wt) or 322 bp (LoxP) in intron 14-15 were used to identify mFermt2 mutation (**Table 2** and **Figure 1**). PCR products were submitted for sequencing to search for INDEL, LoxP, and/or wt sequence.

**Table 2. Primers used in identification of Fermt2 mutants**

| Primer name      | Primer sequence                       | Amplicon (bp) |
|------------------|---------------------------------------|---------------|
| Genotyping PR 5F | 5' -CTTCCCTCAGTGATGGAGTGTGATCTGAG-3'  | 230/264       |
| Genotyping PR 3R | 5' -GGAGTCAGAGAGAAATGGGCACTCTAGGTG-3' |               |
| Genotyping PR 3F | 5' -CTAAAGCAGGCAGGTTGCCTGGAC-3'       | 288/322       |
| Genotyping PR 3R | 5' -CTCTTACCCACTGAGCCATCTCACC-3'      |               |

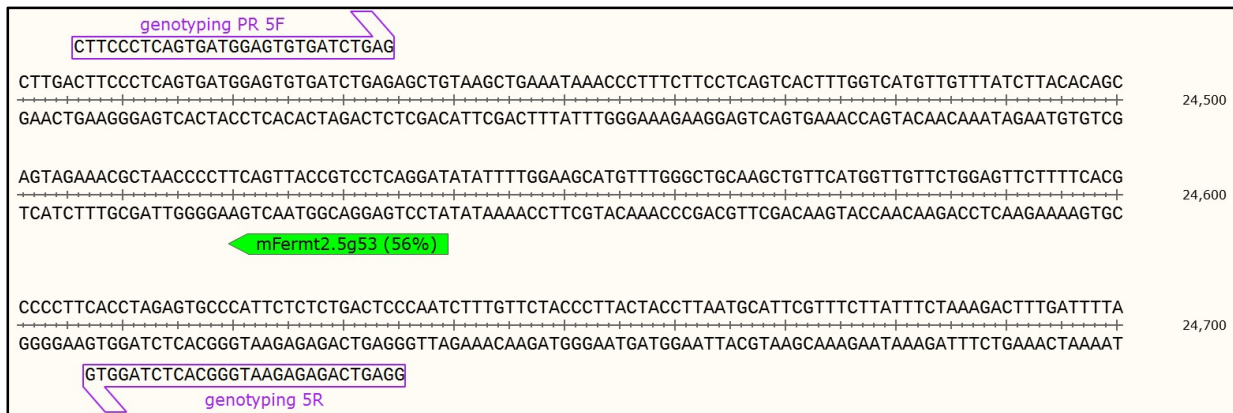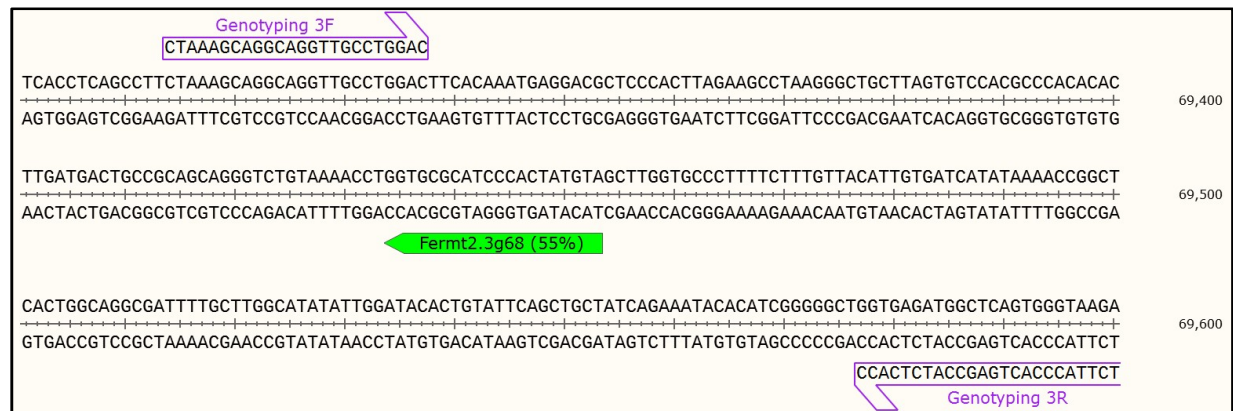

**Figure 1. PCR-sequencing scheme to identify mutants in mouse *Fermt2* gene.** Top panel, intron 1-2 site; Bottom panel, intron 14-15 site; targeting sites were featured with green arrows containing gRNA information.

## Results – genotypes of F0 mice

The 12 pups (2252#1 to 2252#6 and 2254#1 to 2254#6) were genotyped with PCR amplification of the intron 1-2 and intron 14-15 with the primers listed in the **table 2**. As shown in the figure 2, at intron 1-2, the bands amplified from pups 2252#1, 2252#6, 2254#5 are above the band from wt control which suggests that these pups might have loxp insertion; in the same scenario, at intron 14-15, the pups 2252#3, 2252#4, 2252#5, and 2254#4 might contain loxp insertion. To confirm the gel prediction, the PCR products were further subjected to Sanger sequencing (**Table 3**).

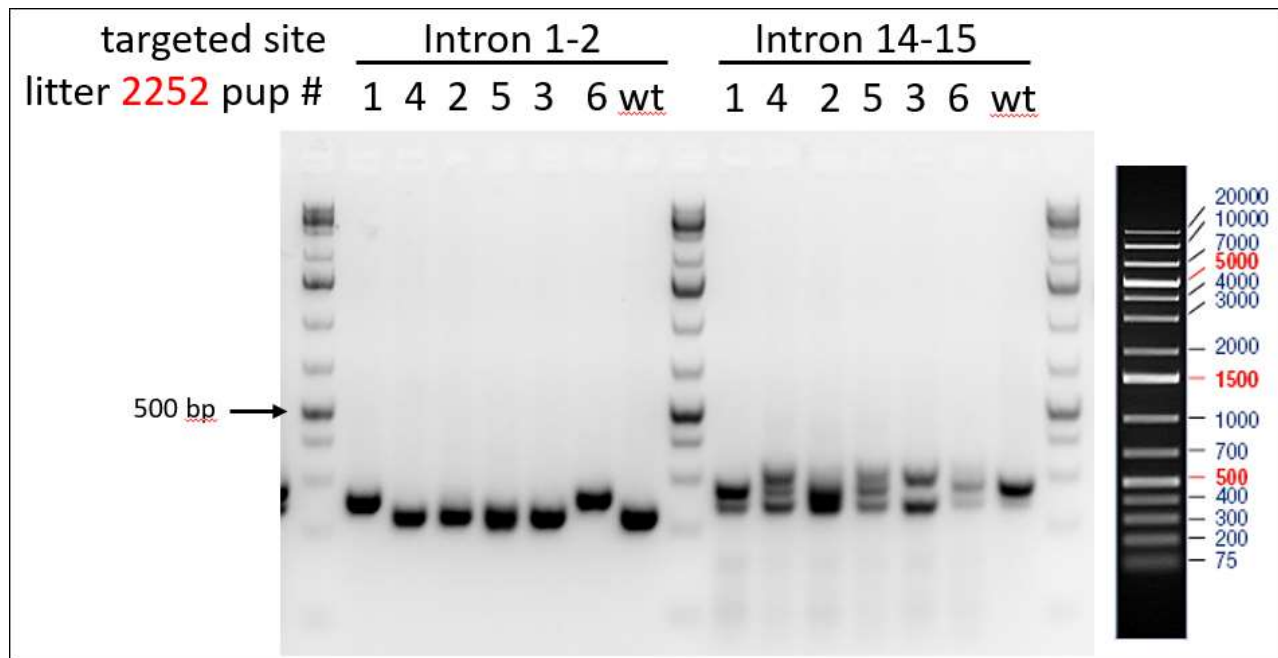

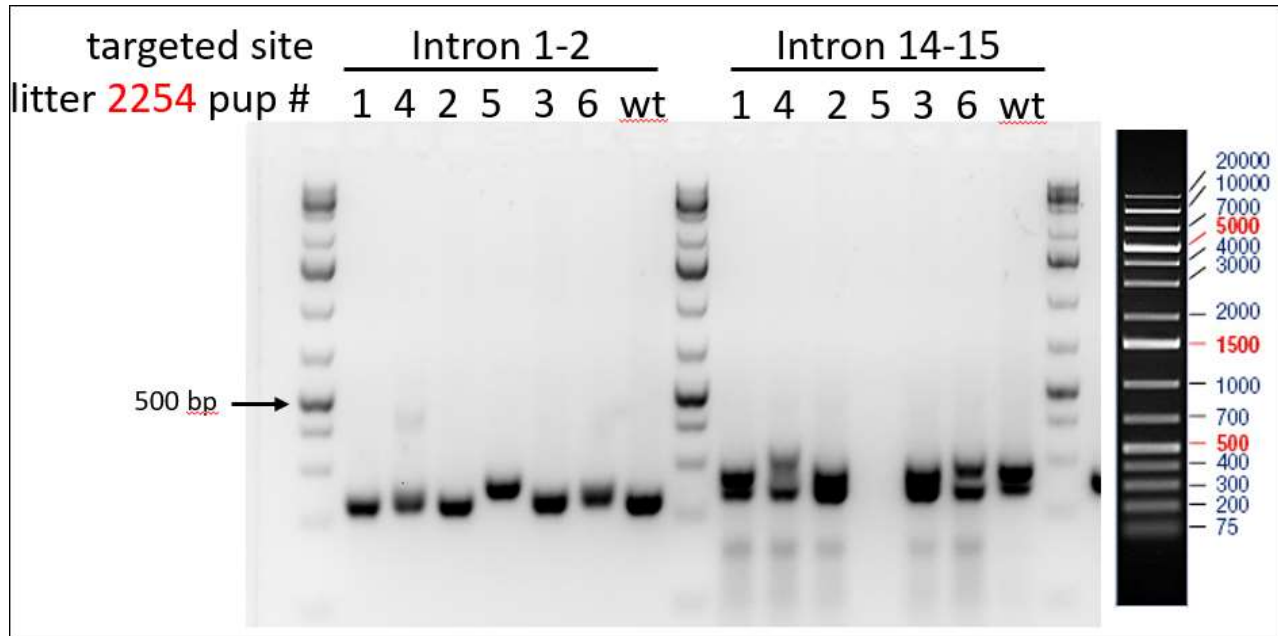

Figure 2. Electrophoresis of the PCR products amplified from the genomic DNA of F0 pups at mFermt2 gene intron 1-2 and intron 14-15 regions prior to sequencing analysis

Table 3. summary of the results from sanger sequencing

| 2252# | Intron1-2  | Intron 14-15 |
|-------|------------|--------------|
| 1     | loxp       | Indel        |
| 2     | Indel      | Indel        |
| 3     | Indel      | LoxP         |
| 4     | Indel      | Indel        |
| 5     | Indel      | Indel        |
| 6     | loxP/Indel | wt           |
| 2254# | Intron1-2  | Intron 14-15 |
| 1     | Indel      | indel        |
| 2     | wt         | indel        |
| 3     | Indel      | indel        |
| 4     | Indel      | Indel        |
| 5     | loxp       | Indel        |
| 6     | Indel      | partial loxp |

### Keep the F0 mice with one loxp insertion for re-targeting

Table 4. the F0 with one loxp inserted

| Mouse ID | DOB    | gender | 5 loxp | 3 loxp |
|----------|--------|--------|--------|--------|
| 2252#1   | 1/4/17 | M      | V      |        |
| 2252#3   | 1/4/17 | F      |        | V      |
| 2252#6   | 1/4/17 | F      | V      |        |
| 2254#5   | 1/4/17 | F      | V      |        |

The F0 females with one loxp insertion (2252#3, 2252#6, and 2254#5) will be superovulated at age of 4 weeks (2/1/17) for re-targeting by microinjection of the eggs produced from these F0 positive mice mating with wt males.

#### Prepared by:

James Luo, Ph.D.  
Senior Scientist & Project Manager  
Applied StemCell, Inc.  
[James.luo@appliedstemcell.com](mailto:James.luo@appliedstemcell.com)

## Production and identification of 5'+3' loxp F0 founders

### Customer information

|                         |                  |
|-------------------------|------------------|
| <b>Project Title</b>    | mFermt2-cKO      |
| <b>Job Ticket</b>       | MC096            |
| <b>Client Name</b>      | Ed Plow, Ph.D.   |
| <b>Client Institute</b> | Cleveland Clinic |
| <b>Report Date</b>      | 06/11/2017       |

### Summary

In the 1<sup>st</sup> round of experiment, delivery of both upstream (5') and downstream (3') modification reagents was done in order to simultaneous modification of both sites, however, this strategy did not work. In most cases (10/12), a F0 mouse contains two indels or one indel/one Loxp at two targeting sites, and these mice are useless intermediate products. Therefore, sequential modifications of upstream (5') and downstream (3') through separate injection of 5' reagents and then 3' reagents were carried out in this report to increase each site knock-in efficiency and successfully generate both 5' and 3' loxp-inserted F0 founders.

### First step: targeting at 5' locus with wild type embryos

Microinjection of 5g53 gRNA/Cas9 protein and 5' ssODN was done to insert a loxp at upstream (5') locus (Table 1). Genomic DNA was extracted from individual F0 pups and used as templates for PCR analysis (Table 2 and Figure1). PCR products were purified for sequence analysis, and the data was summarized in Table 3. The mice with 5' loxp inserted was saved for retargeting.

**Table 1: 1<sup>st</sup> step 5' microinjection and pups born**

| gRNAs:<br>5g53 (ng/μl) | Donor DNA:<br>5'ssODN (ng/μl) | Cas9 protein<br>(ng/μl) | Injection<br>route | #<br>embryos<br>injected | # embryos/#<br>recipient | # Pups<br>born |
|------------------------|-------------------------------|-------------------------|--------------------|--------------------------|--------------------------|----------------|
| 100                    | 250                           | 100                     | cytoplasmic        | 95                       | 74/3                     | 13             |

Table 2. PCR primers used in 5' F0 genotyping

| Primer name      | Primer sequence                      | Amplicon (bp) |
|------------------|--------------------------------------|---------------|
| Genotyping PR 5F | 5' -CTTCCCTCAGTGATGGAGTGTGATCTGAG-3' | 230/264       |
| Genotyping PR 3R | 5' -GGAGTCAGAGAGAATGGGCACTCTAGGTG-3' |               |

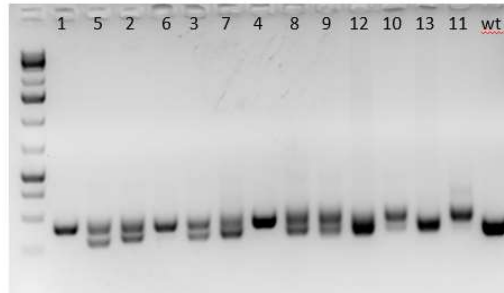

Figure 2 electrophoresis of PCR products from 5' F0 pups

Table 3 sequence analysis of genotypes of the 5' F0 pups

| 2437# | Gender | Genotypes    | Retargeting |
|-------|--------|--------------|-------------|
| 1     | M      | correct loxp | Yes         |
| 2     | M      | correct loxp | Yes         |
| 3     | M      | correct loxp | Yes         |
| 4     | M      | correct loxp | Yes         |
| 5     | M      | correct loxp | yes         |
| 6     | F      | correct loxp | Yes         |
| 7     | F      | correct loxp | Yes         |
| 8     | F      | correct loxp | lost        |
| 9     | F      | correct loxp | Yes         |
| 10    | F      | Partial loxp | No          |
| 11    | F      | correct loxp | Yes         |
| 12    | F      | indel        | No          |
| 13    | F      | indel        | No          |

## Second step: targeting at 3' locus with 5' loxp-inserted embryos

F0 mice containing 5' loxp (5' F0 founders) either males or females are mated with wild type mice to produce embryos for further injection of 3' reagents in order to insert 3' loxp in the genome. Female 5' F0 founders (2437# 6, 7, 9, 11) at 3-4wk old were superovulated and mated with wild type males to produce embryos containing 5' loxp for the earliest injection of 3' reagents (3g68 gRNA/Cas9 protein, 3'ssODN) (Table 4). The pups produced from the 2<sup>nd</sup> step injection were

genotyped to search for both 5' loxp and 3' loxp in the genome by PCR and sequencing analysis (Tables 5 and 6). The potential 5'+3' F0 founders were listed in table 7.

**Table 4: 2<sup>nd</sup> step 3' microinjection and pups born**

| gRNAs:<br>3g68 (ng/μl) | Donor DNA:<br>3'ssODN (ng/μl) | Cas9 protein<br>(ng/μl) | Injection<br>route | #<br>embryos<br>injected | # embryos/#<br>recipient | # Pups<br>born |
|------------------------|-------------------------------|-------------------------|--------------------|--------------------------|--------------------------|----------------|
| 100                    | 250                           | 100                     | cytoplasmic        | 76                       | 59/2                     | 10             |

**Table 5. Primers used in identification of Fermt2 mutants**

| Primer name      | Primer sequence                       | Amplicon (bp) |
|------------------|---------------------------------------|---------------|
| Genotyping PR 5F | 5' -CTTCCCTCAGTGATGGAGTGTGATCTGAG-3'  | 230/264       |
| Genotyping PR 3R | 5' -GGAGTCAGAGAGAAATGGGCACTCTAGGTG-3' |               |
| Genotyping PR 3F | 5' -CTAAAGCAGGCAGGTTGCCTGGAC-3'       | 288/322       |
| Genotyping PR 3R | 5' -CTCTTACCCACTGAGCCATCTCACC-3'      |               |

**Table 6 Next generation sequencing (NGS) analysis of 2<sup>nd</sup> step injection-derived pups**

| 5'+3' F0<br>founders | Gender        | Pup 2580# | 5' Loxp  | Count<br>%  | 3' Loxp     | Count %     |
|----------------------|---------------|-----------|----------|-------------|-------------|-------------|
| <b>v</b>             | <b>Male</b>   | <b>1</b>  | <b>+</b> | <b>18.9</b> | <b>+</b>    | <b>25</b>   |
| x                    | male          | 2         | -        |             | <b>+</b>    | 21.7        |
| x                    | Male          | 3         | <b>+</b> | 22.4        | +/insertion | 8.6         |
| x                    | Male          | 5         | <b>+</b> | 19.7        | -           |             |
| x                    | Male          | 5         | <b>+</b> | 21.4        | -           |             |
| x                    | Female        | 6         | -        |             | <b>+</b>    | 29.9        |
| x                    | Female        | 7         | -        |             | -           |             |
| <b>v</b>             | <b>Female</b> | <b>8</b>  | <b>+</b> | <b>23.3</b> | <b>+</b>    | <b>18.7</b> |
| <b>v</b>             | <b>Female</b> | <b>9</b>  | <b>+</b> | <b>21.6</b> | <b>+</b>    | <b>4.5</b>  |
| x                    | Female        | 10        | <b>+</b> | 16.4        | -           |             |

**Next step: selection of the *cis* loxp insertion in the genome (F1)****Table 7. 5'+ 3' loxp F0 founders**

| Mouse ID | DOB     | gender | 5 loxp | 3 loxp |
|----------|---------|--------|--------|--------|
| 2580#1   | 5/17/17 | M      | V      | v      |
| 2580#8   | 5/17/17 | F      | v      | V      |
| 2580#9   | 5/17/17 | F      | V      | v      |

To select *cis* loxp in the genome of 5'+3' loxp F0 founders, they will be mated with wild type mice to produce pups (F1) for further analysis. The F1 pups containing both 5' and 3' loxp will be the heterozygous cKO founders.

**Prepared by:**

James Luo, Ph.D.  
Senior Scientist & Project Manager  
Applied StemCell, Inc.  
[James.luo@appliedstemcell.com](mailto:James.luo@appliedstemcell.com)
